# Supplementary material for: Ad4BP/SF-1 regulates cholesterol synthesis to boost the production of steroids
Source: PubMed Central journal article supplement (PMC6123728; doi:10.1038/s42003-018-0020-z), 2018-03-22
Supplement: 42003_2018_20_MOESM1_ESM.pdf [file 42003_2018_20_MOESM1_ESM.pdf]

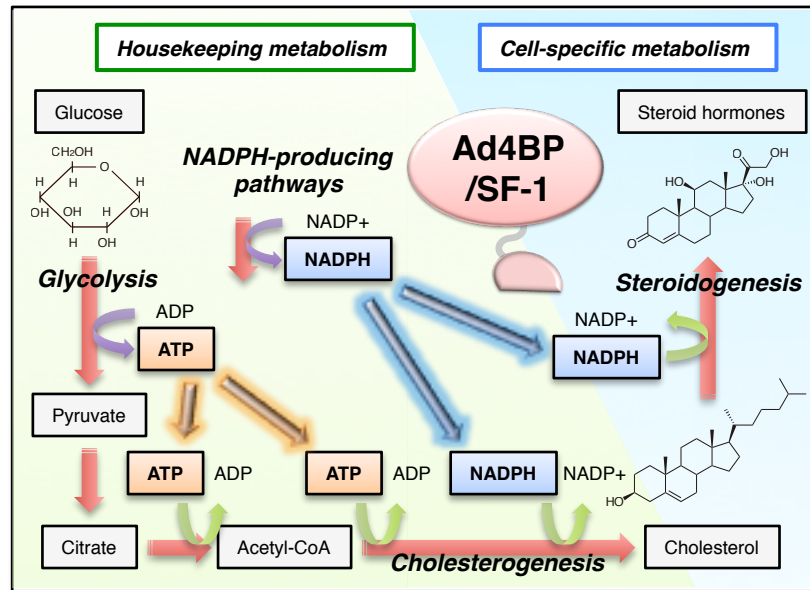

**Supplementary Figure 1. Orchestration of housekeeping and cell-specific metabolism by Ad4BP/SF-1**

Ad4BP/SF-1 regulates housekeeping glycolysis and cholesterogenesis in addition to cell-specific steroidogenesis, and thereby governs these metabolic pathways as a combined regulatory unit. ATP, necessary for acetyl-CoA production and cholesterogenesis, is produced by glycolysis. Not all but some of the major pathways producing NADPH, necessary for cholesterogenesis and steroidogenesis, are regulated by Ad4BP/SF-1. Thus, production and consumption of ATP and NADPH are coordinated through the involvement of Ad4BP/SF-1 in these metabolic pathways. Red arrows indicate reactions regulated by Ad4BP/SF-1. Orange and blue arrows indicate supply routes for ATP and NADPH, respectively.

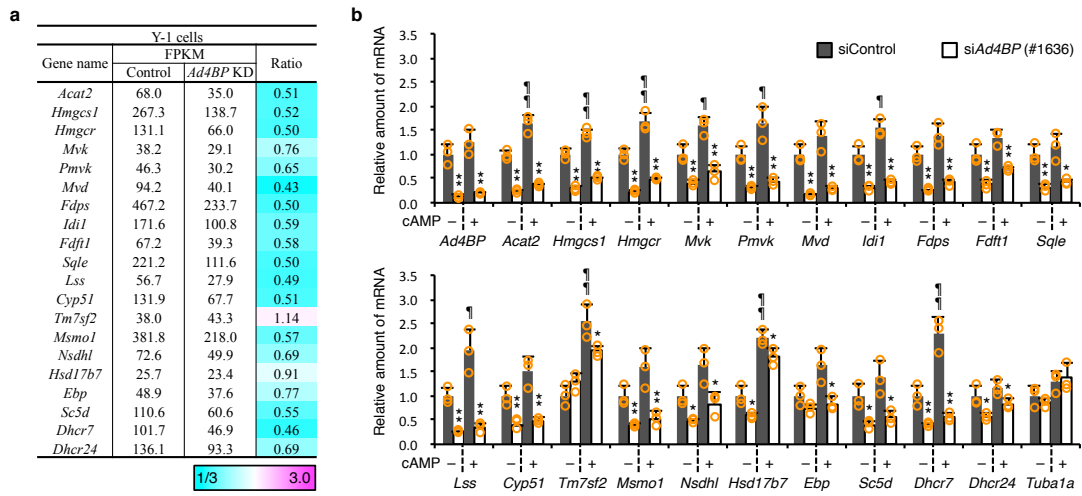

**Supplementary Figure 2. Cholesterogenic gene expression in Y-1 cells affected by *Ad4BP/SF-1* knockdown**

**a**, Cholesterogenic gene expression in Y-1 cells determined by mRNA-seq is shown. FPKM values and ratios of the gene expression (*Ad4BP/SF-1* knockdown vs. Control) are indicated. Magenta and turquoise indicate up- and down-regulated expression, respectively. **b**, Cholesterogenic gene expression in *Ad4BP/SF-1* knockdown and control Y-1 cells was determined by qRT-PCR in the presence (+) or absence (-) of cAMP. To exclude an off-target effect, another *siAd4BP/SF-1* (#1636) was used. Average values and SDs are indicated. The average values for the siControl-treated cells in the absence of cAMP were normalized to 1.0. \* $p < 0.05$ , \*\* $p < 0.01$ . Bars with “†” are compared to vehicle-treated cells; † $p < 0.05$ , †† $p < 0.01$ ,  $n = 3$ .

**a**

| Gene name      | Leydig cells |                 |       | Gene name      | cAMP-treated Leydig cells |                 |       |
|----------------|--------------|-----------------|-------|----------------|---------------------------|-----------------|-------|
|                | FPKM         |                 | Ratio |                | FPKM                      |                 | Ratio |
|                | Control      | <i>Ad4BP</i> KD |       |                | Control                   | <i>Ad4BP</i> KD |       |
| <i>Acat2</i>   | 48.4         | 49.9            | 1.03  | <i>Acat2</i>   | 139.0                     | 114.0           | 0.82  |
| <i>Hmgcs1</i>  | 211.9        | 233.5           | 1.10  | <i>Hmgcs1</i>  | 562.4                     | 354.9           | 0.63  |
| <i>Hmgcr</i>   | 52.0         | 77.6            | 1.49  | <i>Hmgcr</i>   | 167.9                     | 116.4           | 0.69  |
| <i>Mvk</i>     | 21.3         | 25.0            | 1.18  | <i>Mvk</i>     | 48.5                      | 34.8            | 0.72  |
| <i>Pmvk</i>    | 20.3         | 19.0            | 0.93  | <i>Pmvk</i>    | 79.5                      | 34.6            | 0.44  |
| <i>Mvd</i>     | 16.8         | 19.7            | 1.17  | <i>Mvd</i>     | 52.8                      | 25.4            | 0.48  |
| <i>Fdps</i>    | 379.1        | 252.3           | 0.67  | <i>Fdps</i>    | 816.6                     | 370.5           | 0.45  |
| <i>Idi1</i>    | 66.3         | 95.4            | 1.44  | <i>Idi1</i>    | 283.5                     | 227.0           | 0.80  |
| <i>Fdft1</i>   | 62.5         | 55.7            | 0.89  | <i>Fdft1</i>   | 148.1                     | 99.6            | 0.67  |
| <i>Sqle</i>    | 69.9         | 74.0            | 1.06  | <i>Sqle</i>    | 169.2                     | 126.8           | 0.75  |
| <i>Lss</i>     | 30.5         | 36.7            | 1.21  | <i>Lss</i>     | 105.5                     | 59.3            | 0.56  |
| <i>Cyp51</i>   | 90.2         | 94.3            | 1.04  | <i>Cyp51</i>   | 285.9                     | 160.7           | 0.56  |
| <i>Tm7sf2</i>  | 26.9         | 28.2            | 1.05  | <i>Tm7sf2</i>  | 41.2                      | 30.4            | 0.74  |
| <i>Msmo1</i>   | 13.1         | 7.7             | 0.59  | <i>Msmo1</i>   | 11.1                      | 6.1             | 0.54  |
| <i>Nsdhl</i>   | 29.9         | 33.1            | 1.10  | <i>Nsdhl</i>   | 63.5                      | 44.9            | 0.71  |
| <i>Hsd17b7</i> | 29.8         | 33.3            | 1.12  | <i>Hsd17b7</i> | 105.8                     | 47.3            | 0.45  |
| <i>Ebp</i>     | 27.0         | 29.1            | 1.08  | <i>Ebp</i>     | 42.5                      | 41.2            | 0.97  |
| <i>Sc5d</i>    | 144.0        | 101.8           | 0.71  | <i>Sc5d</i>    | 611.1                     | 243.5           | 0.40  |
| <i>Dhcr7</i>   | 29.4         | 17.6            | 0.60  | <i>Dhcr7</i>   | 74.3                      | 20.7            | 0.28  |
| <i>Dhcr24</i>  | 185.5        | 151.5           | 0.82  | <i>Dhcr24</i>  | 317.9                     | 210.6           | 0.66  |


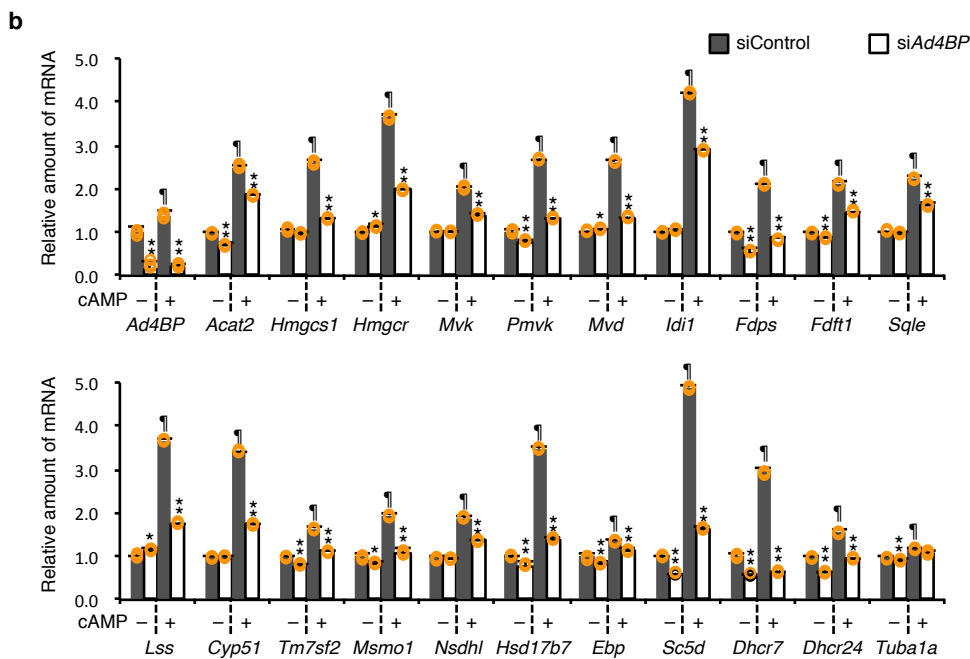

**Supplementary Figure 3. Cholesterogenic gene expression in Leydig cells affected by *Ad4BP/SF-1* knockdown**

**a**, Cholesterogenic gene expression in Leydig cells determined by mRNA-seq in the presence (right) or absence (left) of cAMP is shown. FPKM values and ratios of the gene expressions (*Ad4BP/SF-1* knockdown vs. Control) are indicated. Colorimetric

indication is same as in Supplementary Figure 2. **b**, Cholesterogenic gene expression in *Ad4BP/SF-1* knockdown and control Leydig cells in the presence (+) or absence (-) of cAMP was determined by qRT-PCR. Average values and SDs are indicated. The average values for the siControl-treated cells in the absence of cAMP were normalized to 1.0. Bars with “\*” are compared to siControl-treated cells; \* $p < 0.05$ , \*\* $p < 0.01$ . Bars with an “†” are compared to vehicle-treated cells; † $p < 0.05$ , †† $p < 0.01$ ,  $n=3$ .



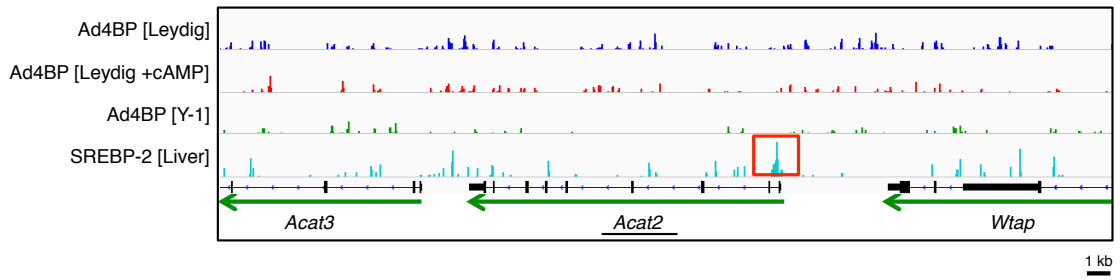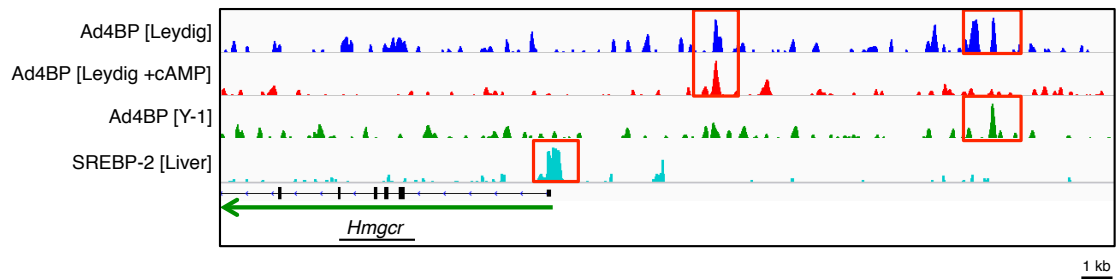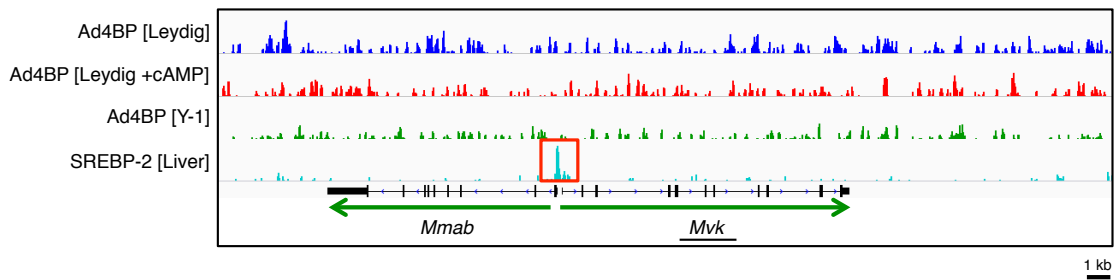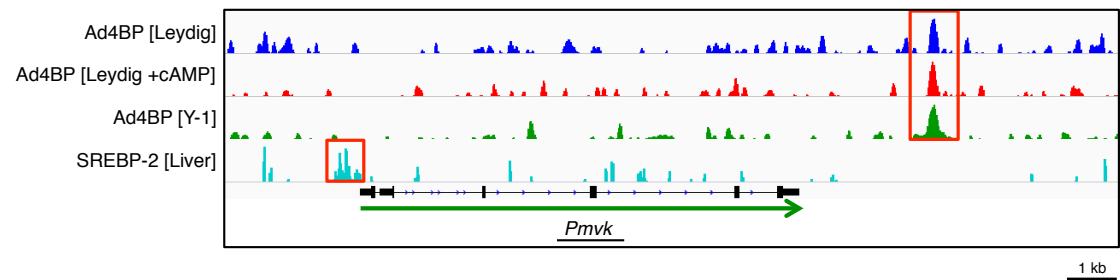

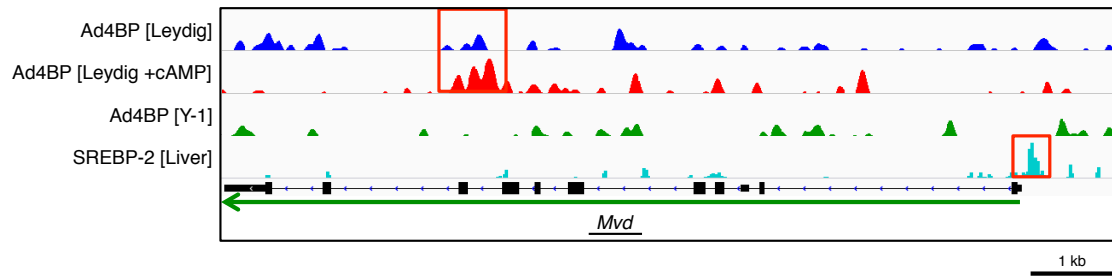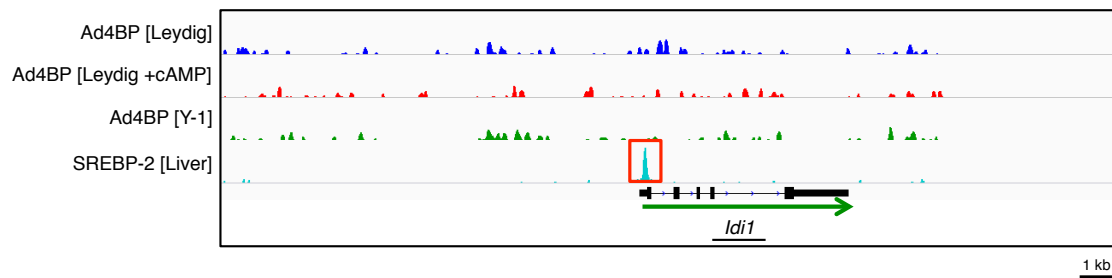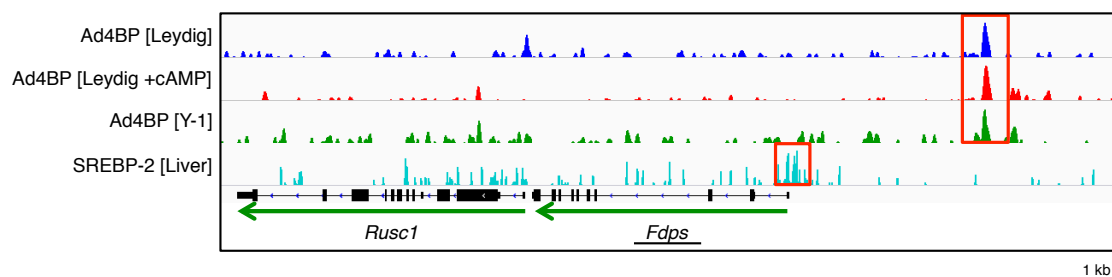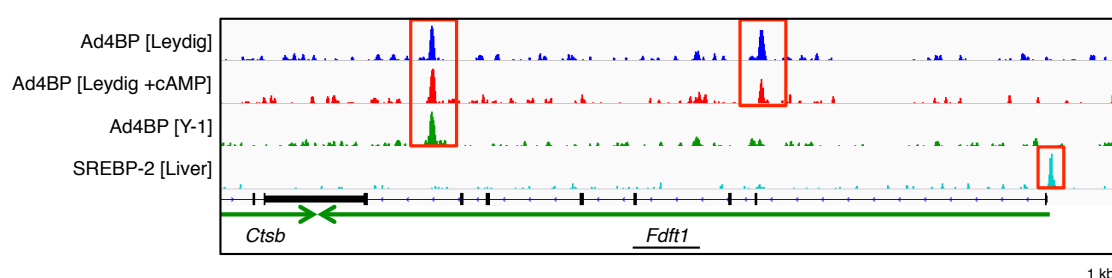

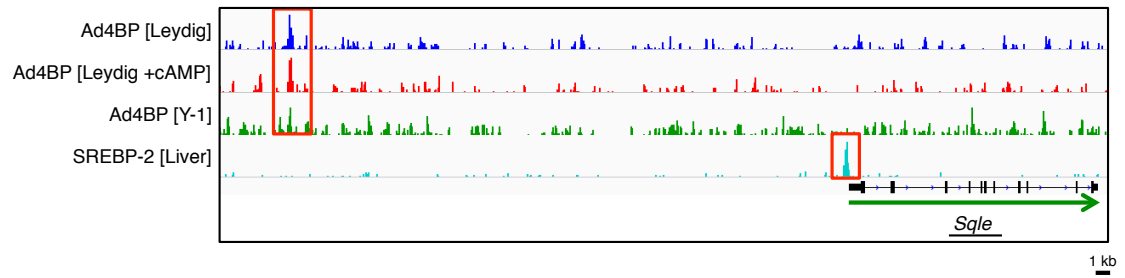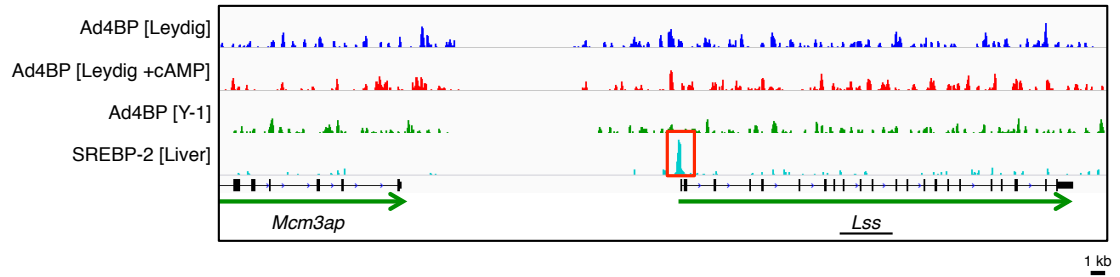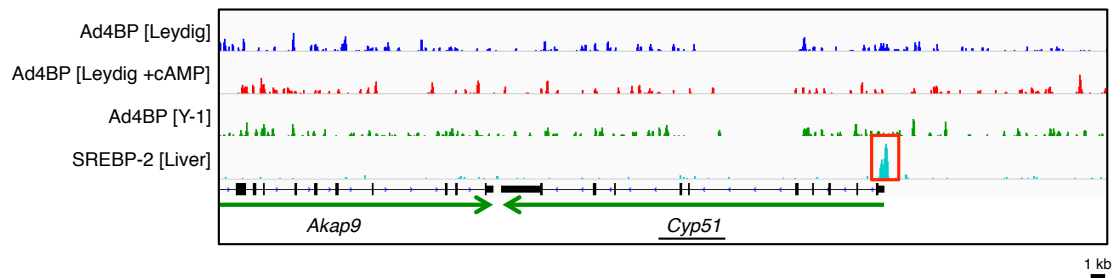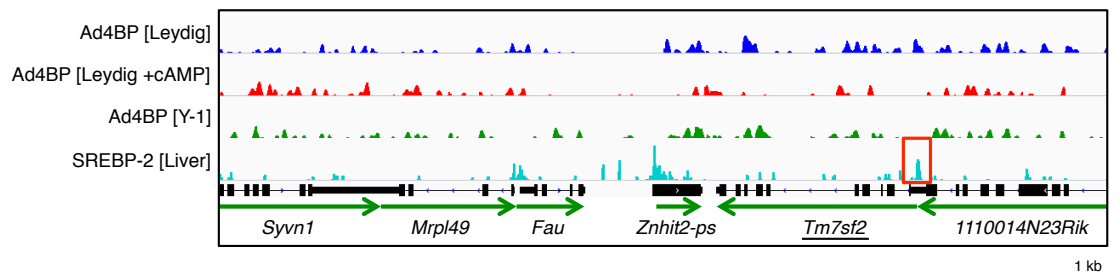

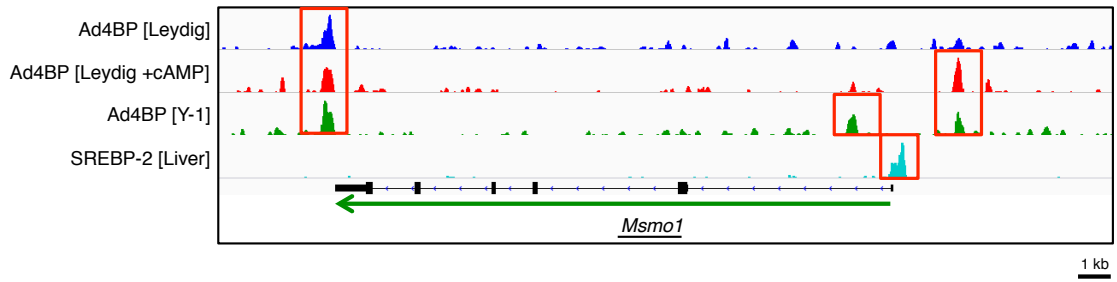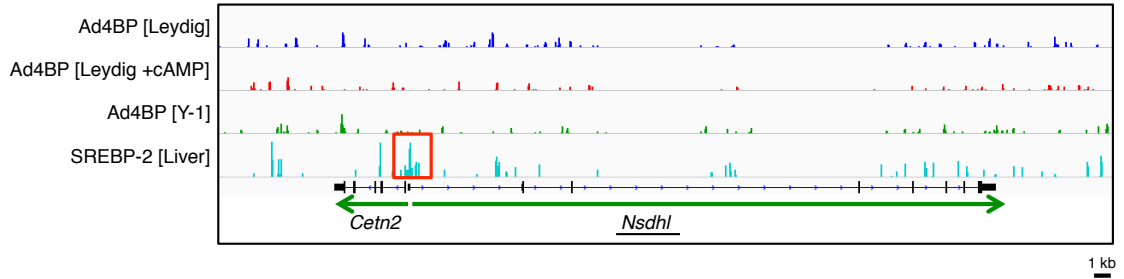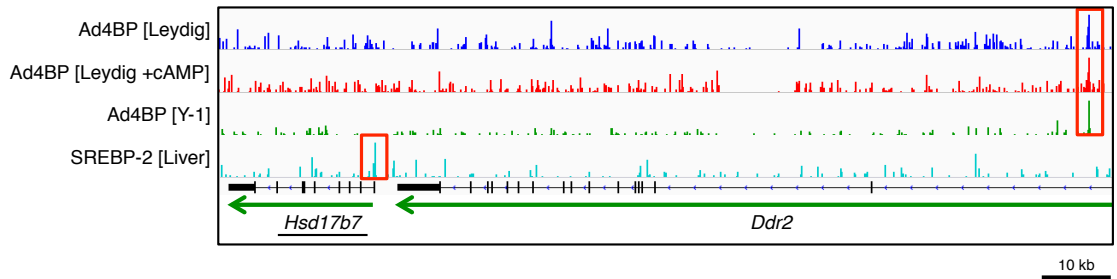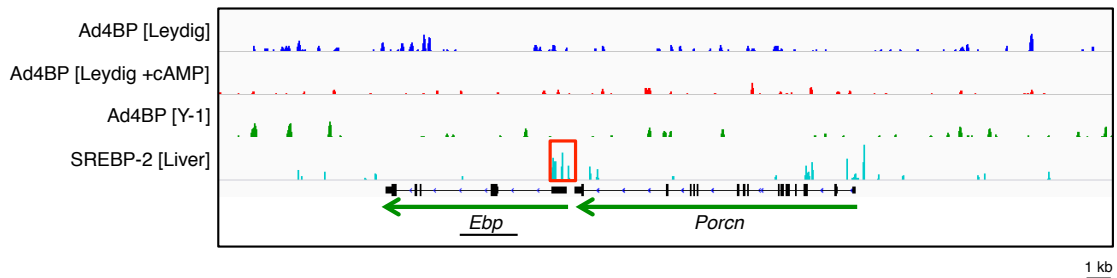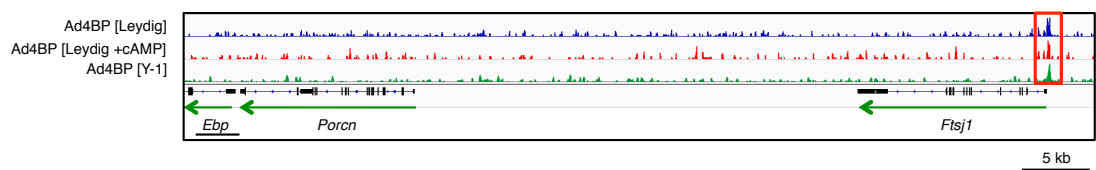

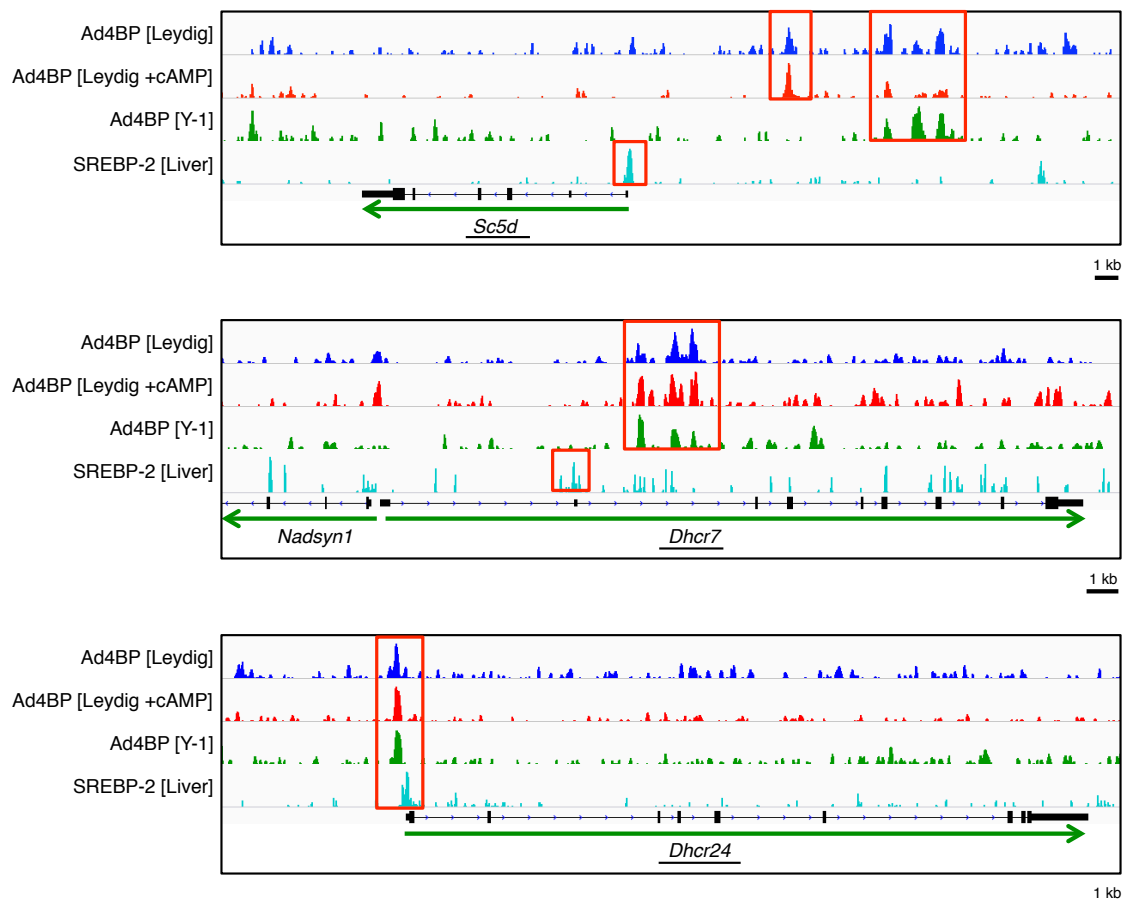

**Supplementary Figure 4. Binding of Ad4BP/SF-1 and SREBP-2 to cholesterologenic gene loci**

Accumulation of Ad4BP/SF-1 and SREBP-2 on the cholesterologenic genes revealed by ChIP-seq studies is shown. Blue, red, and green histograms depict accumulation of Ad4BP/SF-1 in Leydig, cAMP-treated Leydig, and Y-1 cells, respectively. Light blue histogram indicating accumulation of SREBP-2 in the mouse liver was depicted based on the data reported previously<sup>13</sup>. Black boxes indicate exons. Green arrows indicate directions of gene transcription. The ChIP peaks discussed in the text are enclosed by red squares.

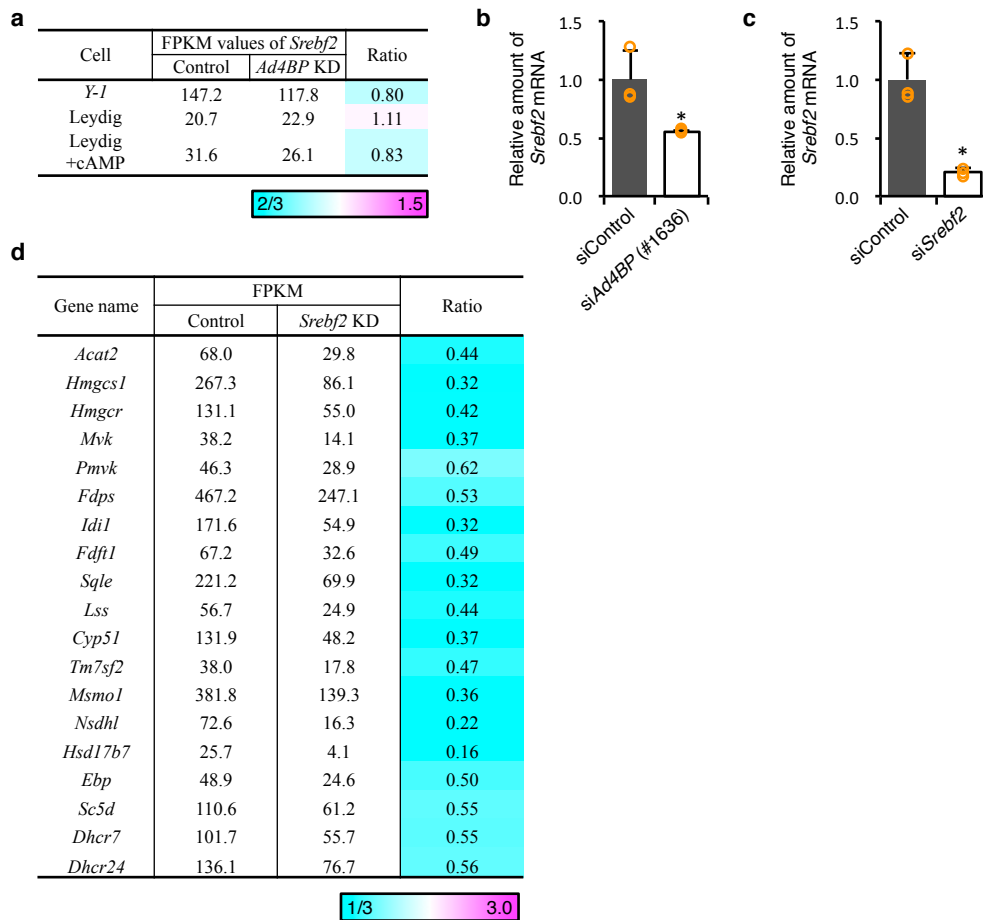

**Supplementary Figure 5. Cholesterogenic gene expression decreased by *Srebf2* knockdown**

**a**, *Srebf2* expression (FPKM values) and ratios of the gene expression (*Ad4BP/SF-1* knockdown vs. Control) in Y-1, Leydig, and cAMP-treated Leydig cells revealed by mRNA-seq are shown. Colorimetric indication is the same as in Supplementary Figure 2. **b**, Expression of *Srebf2* in si*Ad4BP/SF-1* (#1636)-treated Y-1 cells was determined by qRT-PCR. Average values and SDs of *Srebf2* expression are indicated. The average value for the siControl-treated cells was normalized to 1.0. \**p* < 0.05. n=3. **c**, Knockdown of *Srebf2* by siRNA treatment was evaluated by qRT-PCR in Y-1 cells. Average values and SDs of *Srebf2* expression are indicated. The average value for the siControl-treated cells was normalized to 1.0. \**p* < 0.05. n=3. **d**, FPKM values and ratios

of cholesterologenic gene expression (*Srebf2* knockdown vs. Control) in Y-1 cells are shown. Colorimetric indication in **a** and **d** is same as in Supplementary Figure 2.

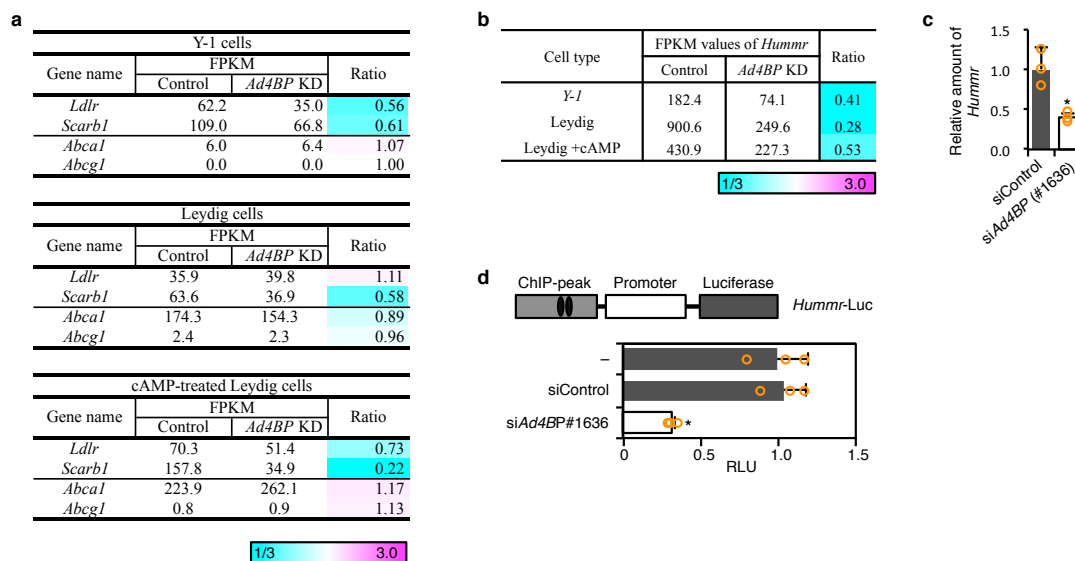

**Supplementary Figure 6. Down-regulation of genes related to cholesterol uptake and transport by *Ad4BP/SF-1* knockdown**

**a**, Expression of genes involved in cholesterol uptake and excretion (FPKM values) revealed by mRNA-seq and ratios of the gene expression (*Ad4BP/SF-1* knockdown vs. Control) in Y-1, Leydig, and cAMP-treated Leydig cells are shown. **b**, *Hummr* gene expression in control and *Ad4BP/SF-1* knockdown Y-1, Leydig, and cAMP-treated Leydig cells was determined by mRNA-seq. The expression (FPKM values) and ratios of the gene expression (*Ad4BP/SF-1* knockdown vs. Control) are shown. Colorimetric indication in **a** and **b** is the same as in Supplementary Figure 2. **c**, Expression of *Hummr* was examined in *Ad4BP/SF-1* knockdown (#1636) Y-1 cells by qRT-PCR. Average values and SDs of *Hummr* expression are indicated. The average value for the siControl-treated cells was normalized to 1.0. \* $p < 0.05$ .  $n=3$ . **d**, *Hummr*-Luciferase reporter activity was examined in control and *Ad4BP/SF-1* knockdown (#1636) cells. \* $p < 0.05$ .  $n=3$ .



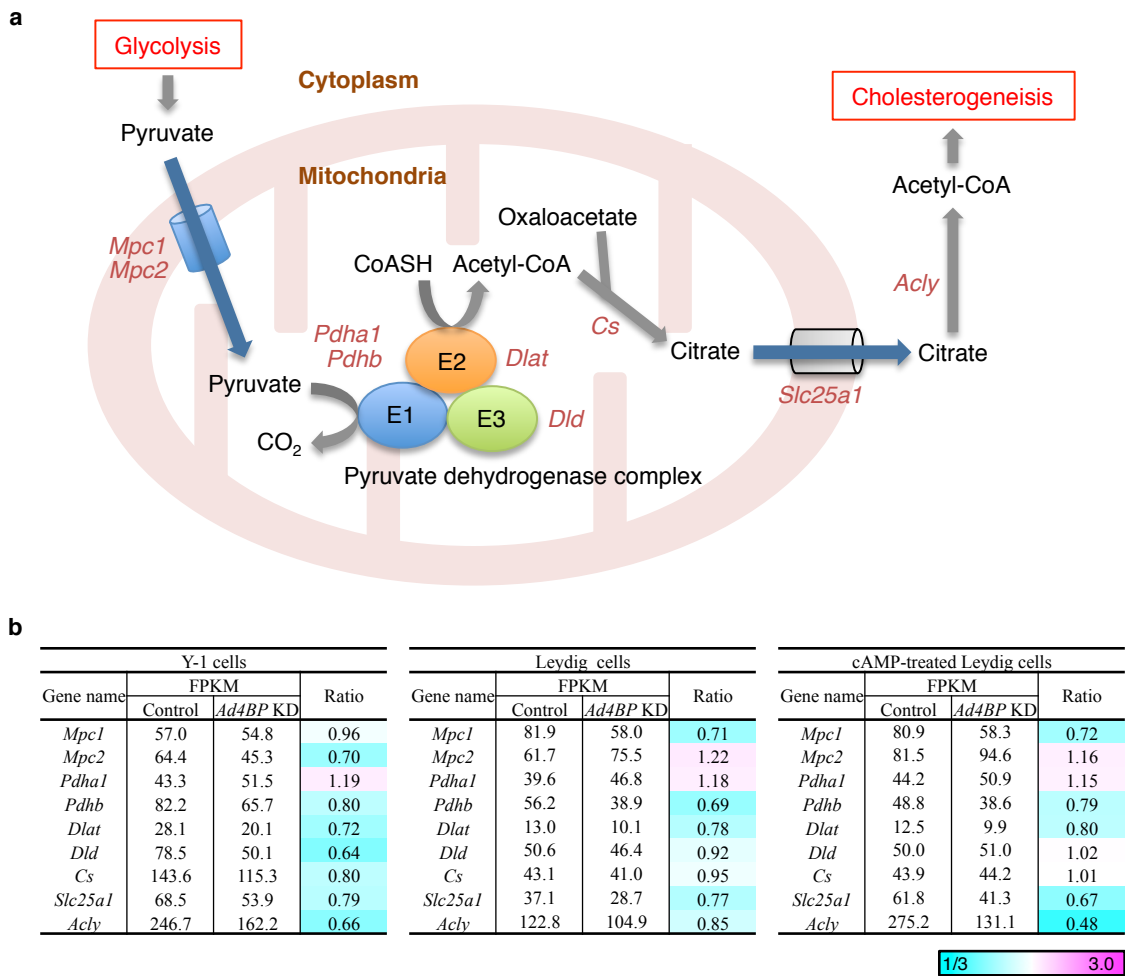

**Supplementary Figure 7. Regulation of genes involved in cholesterol uptake and conversion of pyruvate to acetyl-CoA**

**a**, Whole process of conversion of the end product of glycolysis, pyruvate, to the starting material of cholesterol synthesis, acetyl-CoA, is shown. Genes involved in this process are indicated. **b**, Expression of the genes above (FPKM values) revealed by mRNA-seq and ratios of the gene expression (*Ad4BP/SF-1* knockdown vs. Control) in Y-1, Leydig, and cAMP-treated Leydig cells are shown. Colorimetric indication is the same as in Supplementary Figure 2.

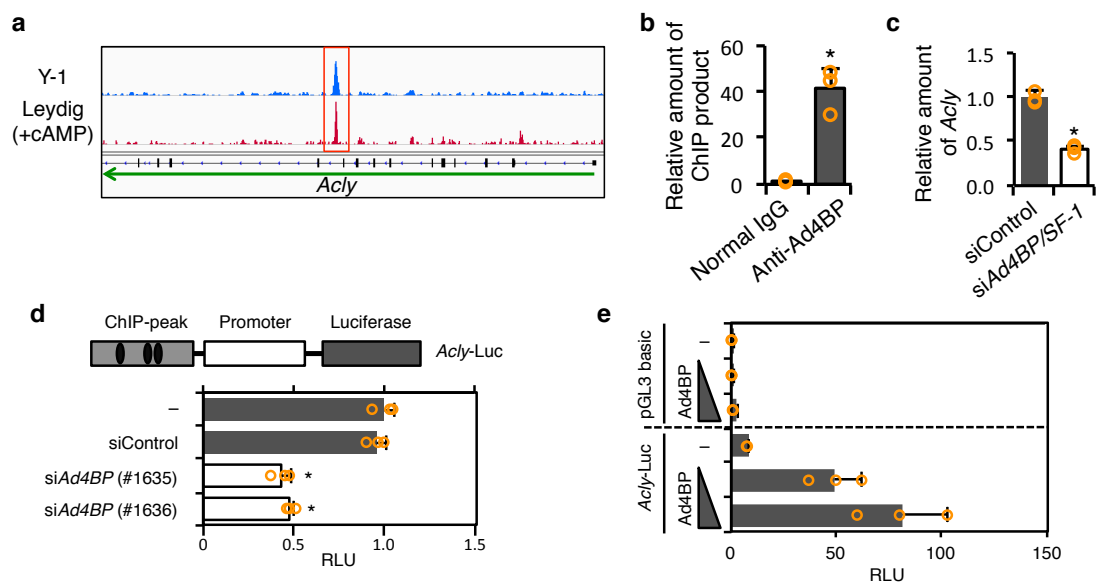

**Supplementary Figure 8. Possible direct regulation of the *Acly* gene by *Ad4BP/SF-1***

**a**, Accumulation of Ad4BP/SF-1 in Y-1 (Blue histogram) and cAMP-treated Leydig cells (red histogram) revealed by ChIP-seq are shown for the *Acly* gene. The ChIP peaks are enclosed by red squares. **b**, Accumulation of Ad4BP/SF-1 to *Acly* was validated by ChIP-qPCR. Average values and SDs are shown. The average value of the control was normalized to 1.0. \* $p < 0.005$ .  $n=3$ . **c**, Expression of *Acly* was examined in *Ad4BP/SF-1* knockdown Y-1 cells by qRT-PCR. Average values and SDs of *Acly* expression are indicated. The average value for the siControl-treated cells was normalized to 1.0. \* $p < 0.005$ . **d**, A luciferase reporter gene construct, *Acly-Luc*, and reporter activity in control and *Ad4BP/SF-1* knockdown Y-1 cells. \* $p < 0.05$ . **e**, Reporter gene activity was examined in the presence of overexpressed *Ad4BP/SF-1* in HeLa cells. **d and e**, Average values and SDs of luciferase activities. Average value with siControl treatment (**d**) or that for pGL3basic without *Ad4BP/SF-1* overexpression (**e**) was normalized to 1.0.  $n=3$ .

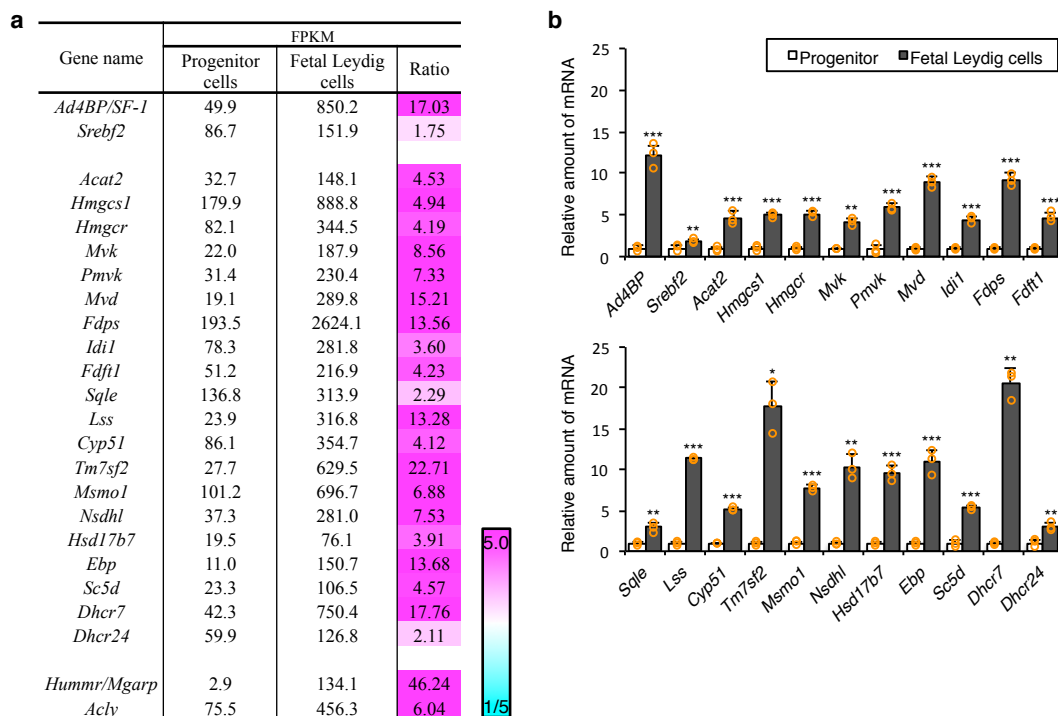

**Supplementary Figure 9. UP-regulation of cholesterologenic genes during differentiation of mouse fetal Leydig cells**

**a**, Expression of *Ad4BP/SF-1*, *Srebf2*, cholesterologenic genes, and *Hummr* were examined with mouse fetal Leydig and progenitor cells. FPKM (fragments per kilobase of transcript per million mapped fragment) values and the ratios (fetal Leydig vs. progenitor cells) are indicated. Magenta and turquoise indicate increased and decreased gene expression, respectively. **b**, Cholesterologenic gene expression in fetal Leydig and progenitor cells were determined by qRT-PCR. Average values and SDs are indicated. The average values for the progenitor cells were normalized to 1.0. \* $p < 0.05$ , \*\* $p < 0.01$ . \*\*\* $p < 0.005$ .  $n=3$ .

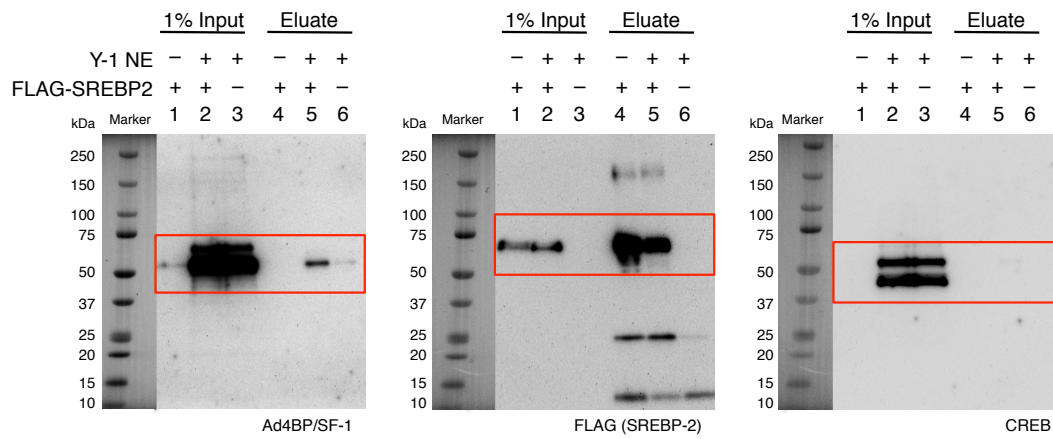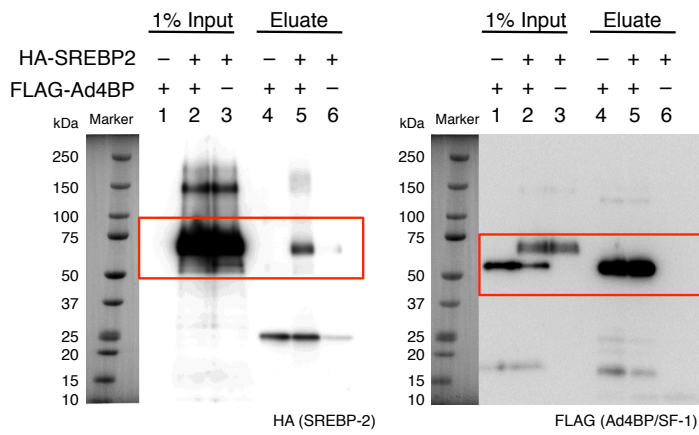

**Supplementary Figure 10. Full blot images for cropped gels.**

The boxed regions are used in Fig. 3b and c.

**Supplementary Table 1.**

Accumulation of Ad4BP/SF-1 to cholesterologenic gene loci, as revealed by ChIP-seq with Y-1 and cAMP-treated Leydig cells. The presence or absence of ChIP peaks and their positions are shown. Numbers of consensus Ad4BP/SF-1-binding sites in ChIP-peak regions and conservation of these sites in the human genome are also indicated.

| Gene name      | Peak position<br>(Distance from TSS) | Y-1 | Leydig<br>(cAMP) | Number of Ad4<br>sites in Mouse | Ad4 site<br>in Human |
|----------------|--------------------------------------|-----|------------------|---------------------------------|----------------------|
| <i>Acat2</i>   | –                                    | –   | –                | –                               | –                    |
| <i>Hmgcs1</i>  | Not applicable                       | –   | –                | –                               | –                    |
| <i>Hmgcr</i>   | Upstream (5.0 kb)                    | ×   | ○                | 1                               | ○                    |
|                | Upstream (14 kb)                     | ○   | ×                | 1                               | ○                    |
| <i>Mvk</i>     | –                                    | –   | –                | –                               | –                    |
| <i>Pmvk</i>    | Downstream (15 kb)                   | ○   | ○                | 1                               | ○                    |
| <i>Mvd</i>     | Intron 7 (6.7 kb)                    | ×   | ○                | 1                               | ○                    |
| <i>Idi1</i>    | –                                    | –   | –                | –                               | –                    |
| <i>Fdps</i>    | Upstream (6.0 kb)                    | ○   | ○                | 1                               | ○                    |
| <i>Fdft1</i>   | Intron 1 (13 kb)                     | ×   | ○                | 2                               | ○                    |
|                | Intron 7 (28 kb)                     | ○   | ○                | 2                               | ○                    |
| <i>Sqle</i>    | Upstream (35 kb)                     | ○   | ○                | 1                               | ○                    |
| <i>Lss</i>     | –                                    | –   | –                | –                               | –                    |
| <i>Cyp51</i>   | –                                    | –   | –                | –                               | –                    |
| <i>Tm7sf2</i>  | –                                    | –   | –                | –                               | –                    |
| <i>Msmo1</i>   | Upstream (2.0 kb)                    | ○   | ○                | 2                               | ○                    |
|                | Intron 1 (1.0 kb)                    | ○   | ×                | 1                               | ○                    |
|                | Downstream (15 kb)                   | ○   | ○                | 1                               | ○                    |
| <i>Nsdhl</i>   | –                                    | –   | –                | –                               | –                    |
| <i>Hsd17b7</i> | Upstream (95 kb)                     | ○   | ○                | 1                               | ○                    |
| <i>Ebp</i>     | Upstream (55 kb)                     | ○   | ○                | 2                               | ○                    |
| <i>Sc5d</i>    | Upstream (12 kb)                     | ○   | ○                | 1                               | ○                    |
|                | Upstream (11 kb)                     | ○   | ○                | 2                               | ○                    |
|                | Upstream (10 kb)                     | ○   | ○                | 2                               | ○                    |
|                | Upstream (6.0 kb)                    | ×   | ○                | 2                               | ○                    |
| <i>Dhcr7</i>   | Intron 1 (2.3 kb)                    | ○   | ○                | 1                               | ○                    |
|                | Intron 1 (3.6 kb)                    | ○   | ○                | 4                               | ○                    |
|                | Intron1 (4.2 kb)                     | ○   | ○                | 1                               | ○                    |
| <i>Dhcr24</i>  | Basal promoter                       | ○   | ○                | 1                               | ○                    |
